# Supplementary material
Source: Springer Nature journal article supplement (https://www.springermedizin.de/resource/supplementary/13063_2010_451_MOESM1_ESM.PDF/9618242)
Supplement: MOESM1 [file 9618242]

# ENTRY FORM

PLEASE COMPLETE BEFORE RANDOMISING THE WOMAN

## ABOUT YOUR HOSPITAL *(please ensure all information below is contained in the medical records)*

|                                                     |  |
|-----------------------------------------------------|--|
| <b>1.</b> Country                                   |  |
| <b>2.</b> Hospital code <i>(in your Study File)</i> |  |

## ABOUT THE PATIENT

|                                                            |        |                                                  |       |      |                         |       |
|------------------------------------------------------------|--------|--------------------------------------------------|-------|------|-------------------------|-------|
| <b>3.</b> Patient's initials <i>(first name/last name)</i> |        | <b>4.</b> Patient Hospital identification number |       |      |                         |       |
| <b>5.</b> Do you know her date of birth? <i>(circle)</i>   | a) YES | day                                              | month | year | b) NO – approximate age | years |

## ABOUT THE DELIVERY

|                                                                  |                                                                                            |                          |                                                                                                                                                                                    |       |         |  |
|------------------------------------------------------------------|--------------------------------------------------------------------------------------------|--------------------------|------------------------------------------------------------------------------------------------------------------------------------------------------------------------------------|-------|---------|--|
| <b>6.</b> Delivery of the baby in this hospital? <i>(circle)</i> | YES                                                                                        | NO                       |                                                                                                                                                                                    |       |         |  |
| <b>7.</b> Type of delivery <i>(circle)</i>                       | VAGINAL                                                                                    | CAESAREAN SECTION        |                                                                                                                                                                                    |       |         |  |
| <b>8.</b> Date of delivery                                       | day                                                                                        | month                    | year                                                                                                                                                                               |       |         |  |
| <b>9.</b> Time of delivery <i>(24-hour clock)</i>                | hours                                                                                      | minutes                  |                                                                                                                                                                                    |       |         |  |
| <b>10.</b> Placenta fully delivered? <i>(circle)</i>             | YES                                                                                        | NO                       |                                                                                                                                                                                    |       |         |  |
| <b>11.</b> Primary cause of haemorrhage? <i>(circle)</i>         | UTERINE ATONY                                                                              | PLACENTA PRAEVIA/ACCRETA | SURGICAL TRAUMA/TEARS                                                                                                                                                              | OTHER | UNKNOWN |  |
| <b>12.</b> Systolic Blood Pressure                               | mmHg <i>(most recent measurement prior to randomisation)</i>                               |                          |                                                                                                                                                                                    |       |         |  |
| <b>13.</b> Estimated volume of blood loss                        | Millilitres <i>(estimated from delivery of baby to immediately prior to randomisation)</i> |                          |                                                                                                                                                                                    |       |         |  |
| <b>14.</b> Any uterotonic prophylaxis given?                     | YES                                                                                        | NO                       | UNKNOWN                                                                                                                                                                            |       |         |  |
| <b>15.</b> Clinical signs of haemodynamic instability?           | YES                                                                                        | NO                       | Haemodynamic instability assessment based on clinical signs <i>(e.g. low BP, tachycardia, falling urine output)</i> that requires an intervention <i>(e.g. intravenous fluids)</i> |       |         |  |

## RANDOMISATION INFORMATION

|                                                   |                                                                                            |          |                                                              |                                                         |             |         |  |
|---------------------------------------------------|--------------------------------------------------------------------------------------------|----------|--------------------------------------------------------------|---------------------------------------------------------|-------------|---------|--|
| <b>16.</b> Eligible? <i>(circle)</i>              | <b>YES</b> <i>(Get the lowest available number treatment pack and follow instructions)</i> |          | <b>NO</b> <i>(Do not randomise, record on screening log)</i> |                                                         |             |         |  |
| <b>17.</b> Consent obtained from? <i>(circle)</i> | Woman                                                                                      | Relative | Other representative                                         | Waiver                                                  |             |         |  |
| <b>18.</b> Insert treatment pack number here      | <b>BOX</b>                                                                                 |          |                                                              |                                                         | <b>PACK</b> |         |  |
| <b>19.</b> Date of randomisation                  | day                                                                                        | month    | year                                                         | <b>20.</b> Time of randomisation <i>(24-hour clock)</i> | hours       | minutes |  |
| <b>21.</b> a) Name of person randomising patient  |                                                                                            |          |                                                              | b) Signature                                            |             |         |  |

**PLEASE SEND THIS FORM TO THE COORDINATING CENTRE IMMEDIATELY AFTER RANDOMISATION**

[SEE GUIDANCE OVERLEAF](#)

## DATA FORMS GUIDANCE

### AFTER COMPLETING THIS PAPER FORM, YOU CAN:

- ❖ Enter these data directly into the trial database (username and password required)  
[www.thewomantrial.Lshtm.ac.uk](http://www.thewomantrial.Lshtm.ac.uk)
- ❖ Complete an Electronic Data Form (EDF) and send by email or upload to the trial intranet at  
[www.thewomantrial.Lshtm.ac.uk](http://www.thewomantrial.Lshtm.ac.uk)
- ❖ Send as a secure scanned document by email to [woman.data@Lshtm.ac.uk](mailto:woman.data@Lshtm.ac.uk)
- ❖ Fax to +44 20 7299 4663
- ❖ Store original form in the Investigator's Study File
- ❖ **PLEASE GIVE A COPY OF THIS COMPLETED FORM TO THE PERSON RESPONSIBLE FOR COMPLETING THE OUTCOME FORM AT YOUR HOSPITAL**

|               |
|---------------|
| <b>NOTES:</b> |
|               |
|               |
|               |

|                                                                                                     |
|-----------------------------------------------------------------------------------------------------|
| <b>FOR ADVERSE EVENTS, UNBLINDING AND OTHER URGENT ENQUIRIES PLEASE TELEPHONE +44(0)7768 707500</b> |
|-----------------------------------------------------------------------------------------------------|

**PLEASE NOTE: IF YOUR QUERY IS NOT URGENT PLEASE USE THE NORMAL CONTACT DETAILS IN THE INVESTIGATOR'S STUDY FILE.**
